# Supplementary material for: Theoretical insights into the structural, electronic, photocatalytic and supercapacitor applications of pentahexoctite
Source: Royal Society of Chemistry journal article supplement (doi:10.1039/d5cp04410c), 2026-01-01
Supplement: d5cp04410c1.pdf [file d5cp04410c1.pdf]

## Supporting Information

### Theoretical Insights into the Structural, Electronic, Photocatalytic and Supercapacitor Application of Pentaheoctite

Nirmal Barman and Utpal Sarkar\*

Department of Physics, Assam University, Silchar-788011, India

\*Correspondence: Dr. Utpal Sarkar ([utpalchemiitkgp@yahoo.com](mailto:utpalchemiitkgp@yahoo.com))

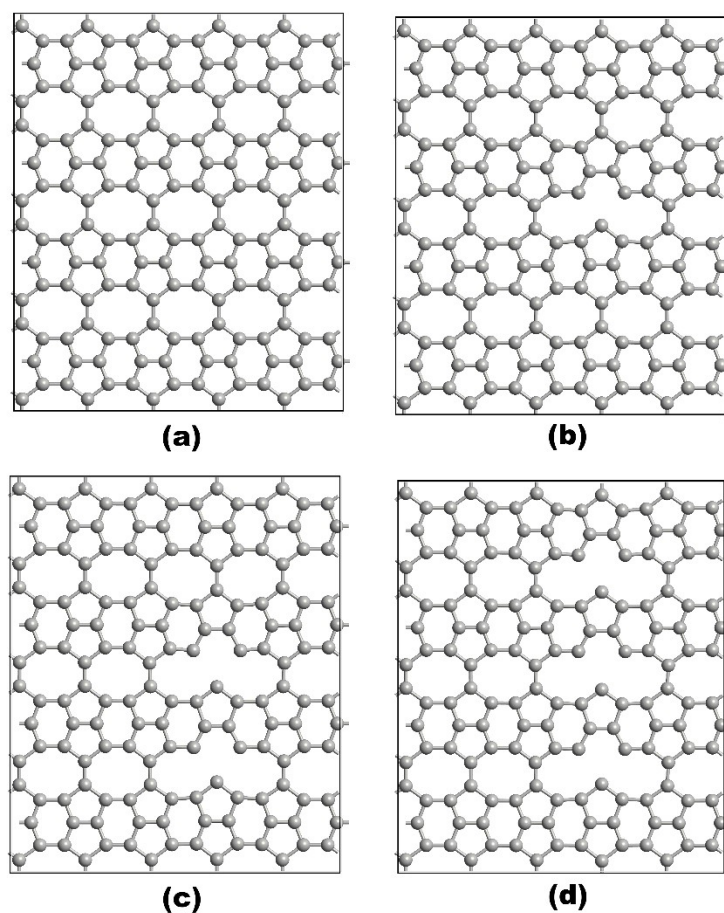

**Figure S1:** Optimized structure of (a)  $4 \times 5 \times 1$  supercells of pristine pentaheoctite, (b) single vacancy, (c) double vacancy and (d) triple vacancy of  $4 \times 5 \times 1$  supercells of pristine pentaheoctite.

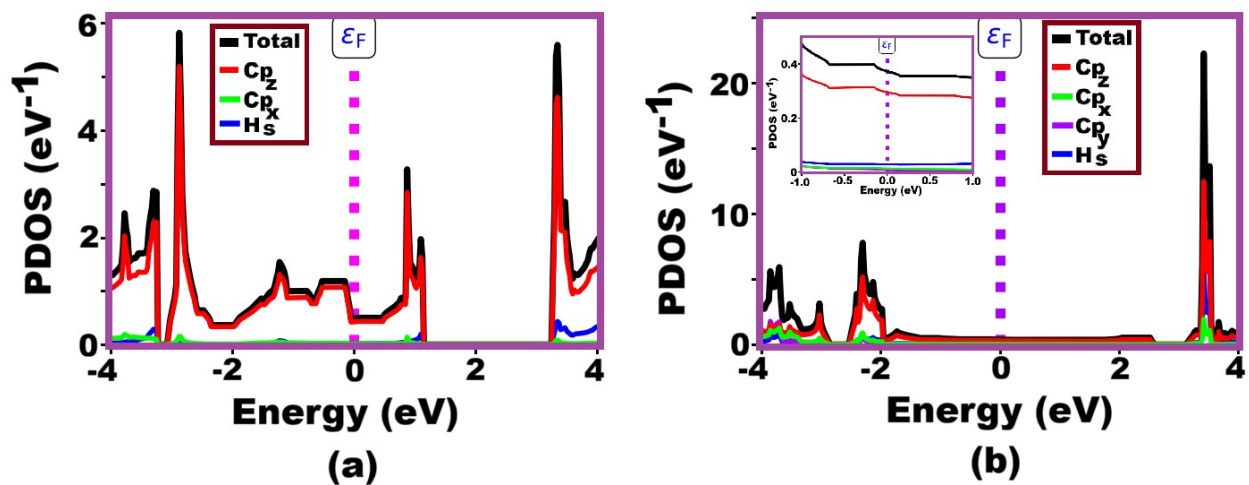

**Figure S2.** Projected density of states (PDOS) (a) 1H-decorated pentahexoctite and (b) 3H-decorated pentahexoctite.

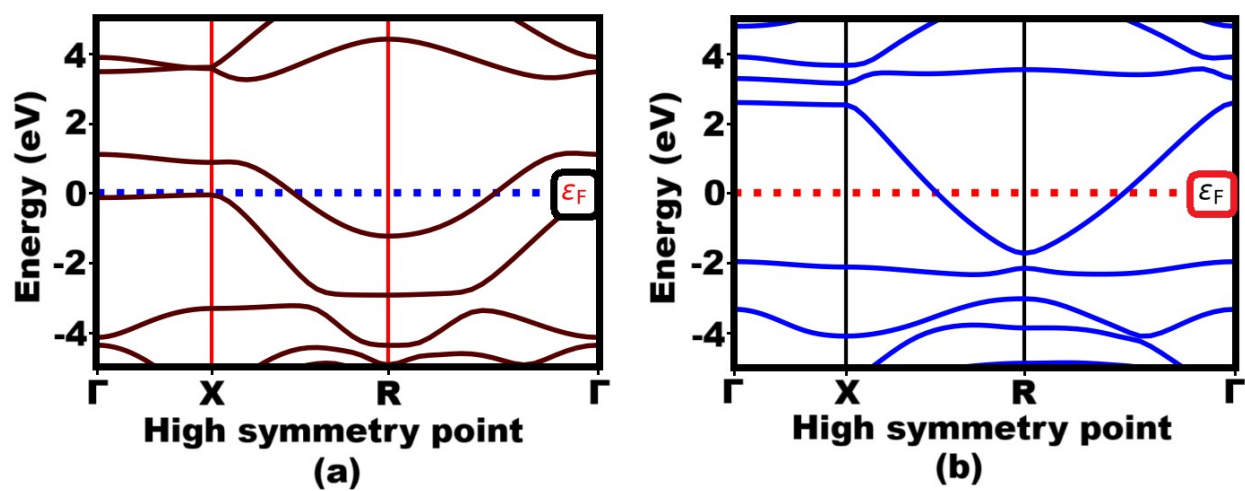

**Figure S3:** Bandstructure of H-decorated pentahexoctite; (a) 1H-decorated pentahexoctite and (b) 3H-decorated pentahexoctite.

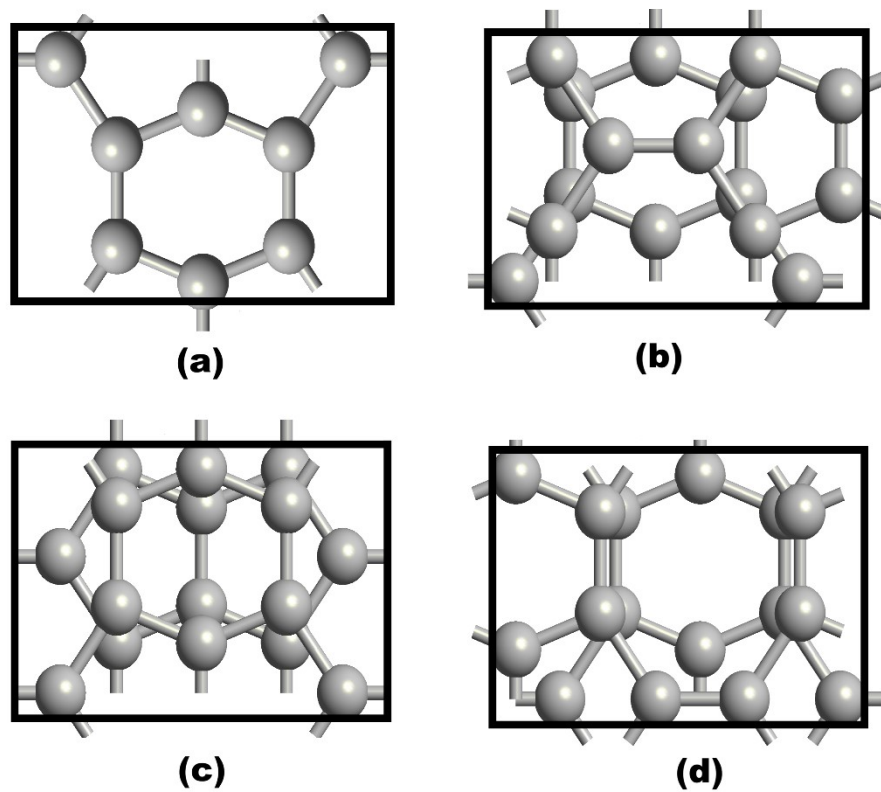

**Figure S4:** Optimized structure of (a) AA stacking mode, (b) AB stacking mode, (c) AC stacking mode and (d) AD stacking mode.

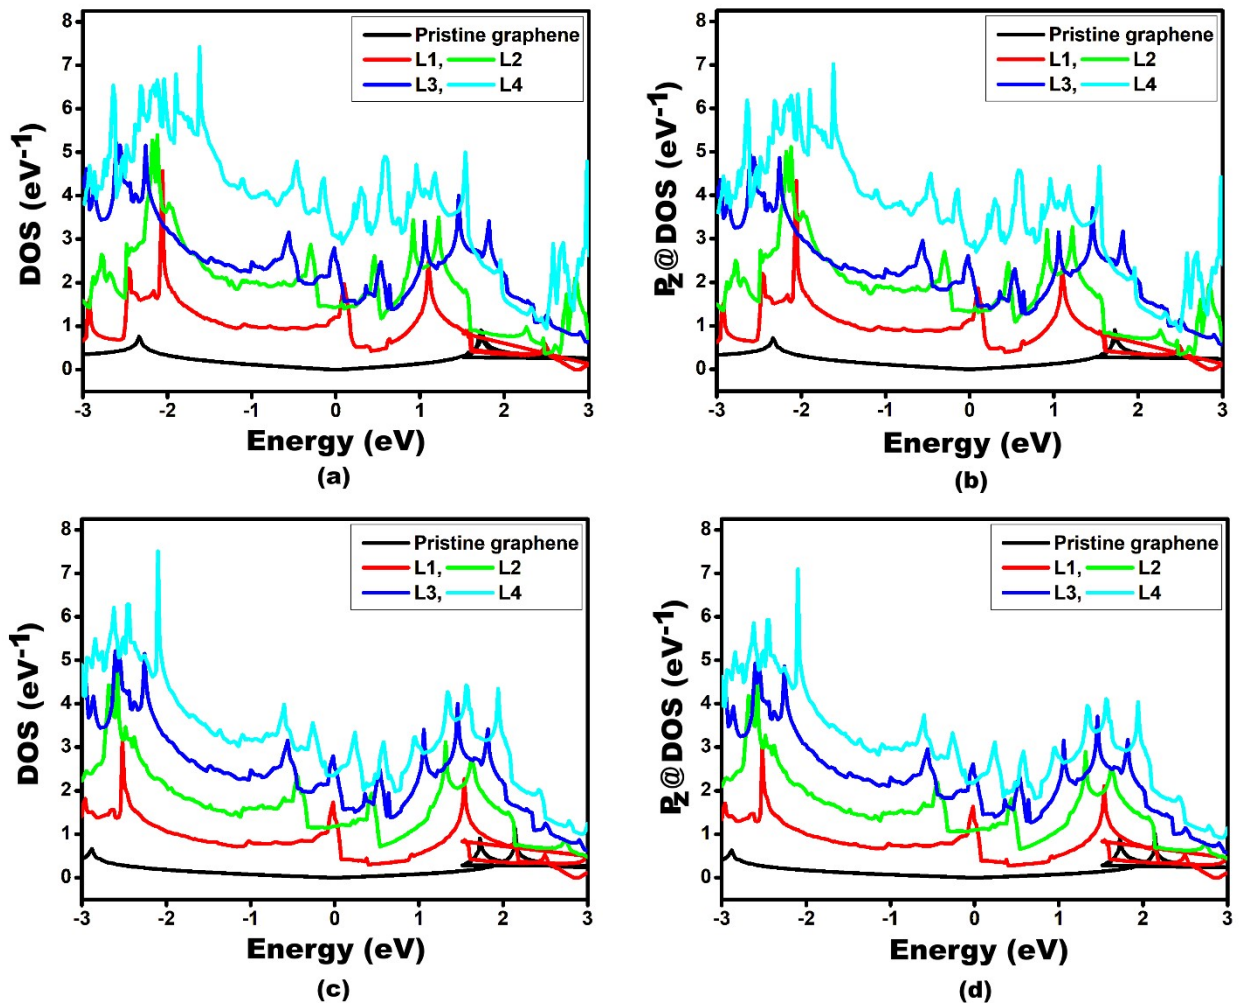

**Figure S5:** Density of states (a) for PBE-D3 functional (c) for HSE06 functional. Density of states of p<sub>z</sub> contribution (b) for PBE-D3 functional and (d) for HSE06 functional for pristine graphene, pentahexoctite and its multi-layers (L1, L2, L3 and L4).

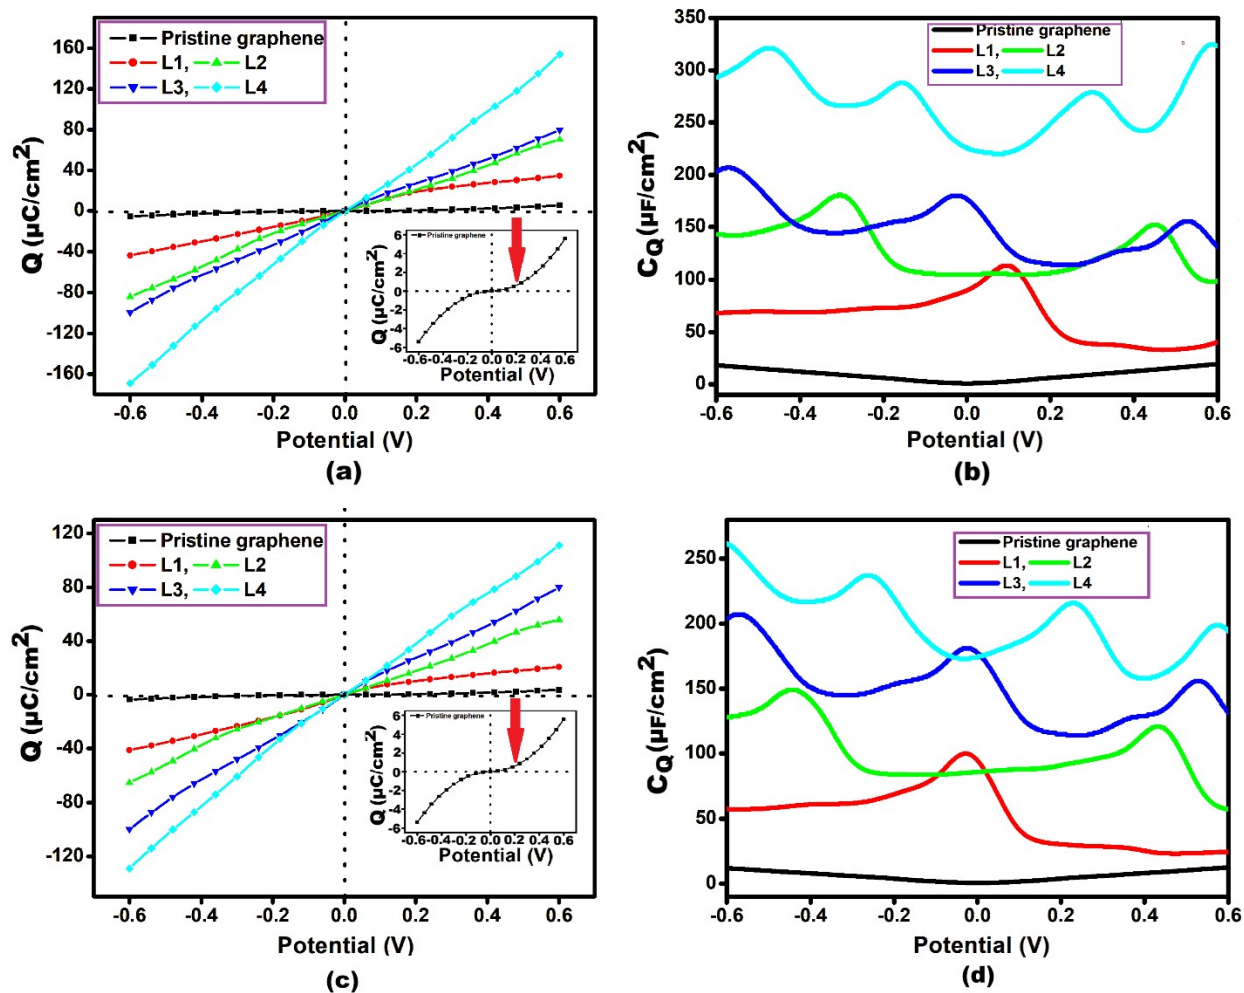

**Figure S6:** Surface charge density (a) for PBE-D3 functional (c) for HSE06 functional. Quantum capacitance (b) for PBE-D3 functional and (d) for HSE06 functional for pristine graphene, pentahexoctite and its multi-layers (L1, L2, L3 and L4).

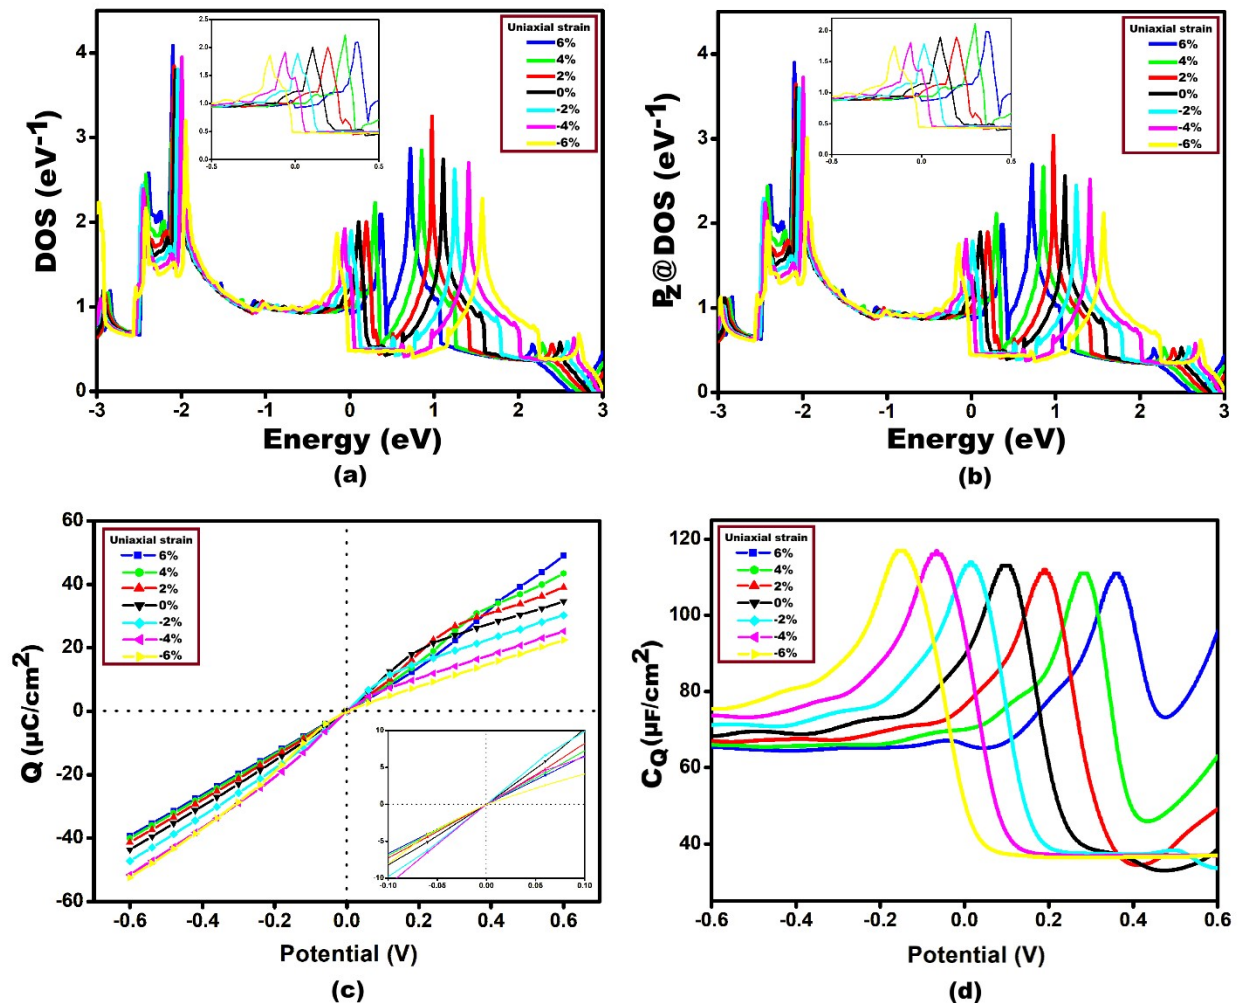

**Figure S7:** (a) Density of states, (b) density of states of  $p_z$  contribution to DOS and (c) Surface charge density and (d) quantum capacitance of pentahexoctite for uniaxial strain.

**Table S1:** The maximum surface charge density ( $Q^+$  and  $Q^-$ ) and nature of electrode type of multi-layered pentahexoctite using PBE-D3 and HSE06 functional.

| Effect of multi-layered structure (PBE-D3 functional) |                                     |                                     |             |                |
|-------------------------------------------------------|-------------------------------------|-------------------------------------|-------------|----------------|
| System                                                | $Q^+$ ( $\mu\text{C}/\text{cm}^2$ ) | $Q^-$ ( $\mu\text{C}/\text{cm}^2$ ) | $ Q^+/Q^- $ | Electrode type |
| L1                                                    | 34.479                              | -43.677                             | 0.789       | Negative       |
| L2                                                    | 70.213                              | -83.794                             | 0.837       | Negative       |
| L3                                                    | 79.657                              | -99.375                             | 0.802       | Negative       |
| L4                                                    | 153.939                             | -168.684                            | 0.913       | Symmetric      |



| <b>Effect of multi-layered structure (HSE06 functional)</b> |         |          |       |          |
|-------------------------------------------------------------|---------|----------|-------|----------|
| L1                                                          | 20.623  | -41.212  | 0.500 | Negative |
| L2                                                          | 55.664  | -65.151  | 0.854 | Negative |
| L3                                                          | 79.950  | -99.740  | 0.801 | Negative |
| L4                                                          | 110.801 | -129.446 | 0.856 | Negative |
